# Supplementary figures and images for: Mitochondrial oxidative stress contributes to diastolic dysfunction through impaired mitochondrial dynamics
Source: PubMed Central journal article supplement — Redox Biol. 2022 Sep 17;57:102474. doi: 10.1016/j.redox.2022.102474 (PMC9530618; doi:10.1016/j.redox.2022.102474), 2022-09-17

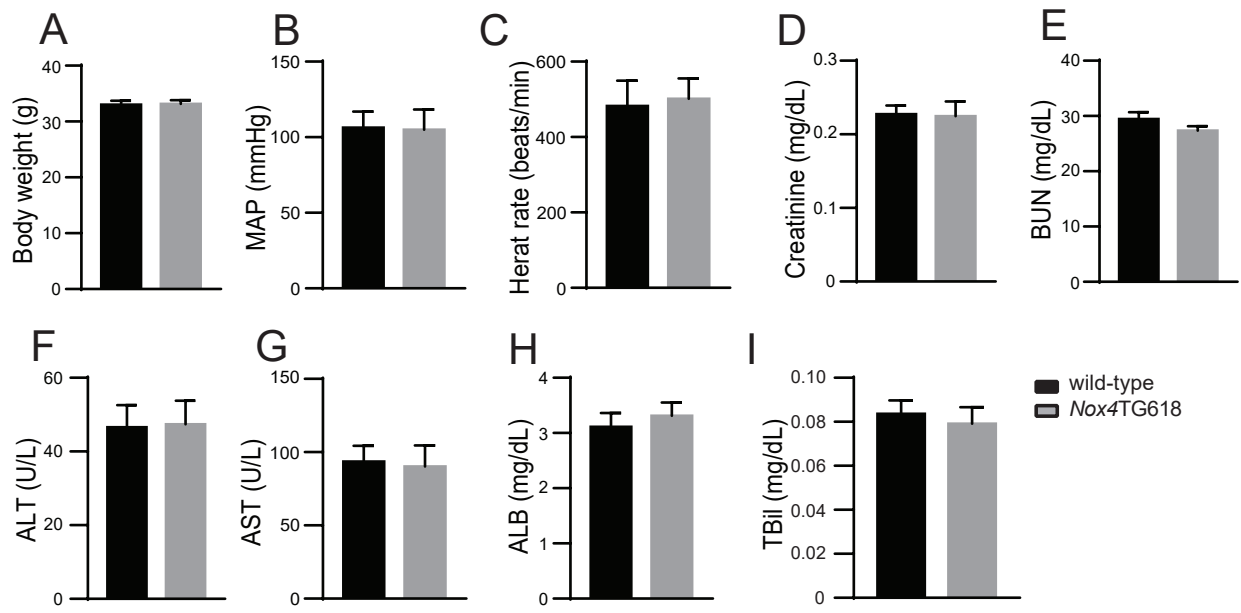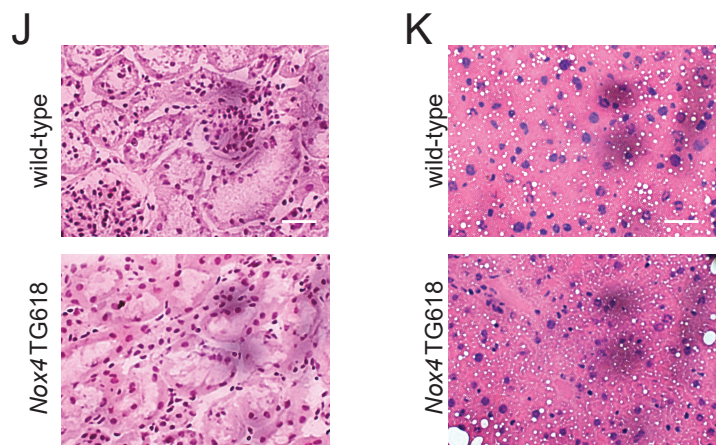

Supplement: mmc2.pdf [file mmc2.pdf]

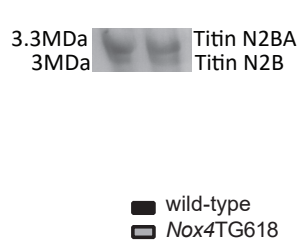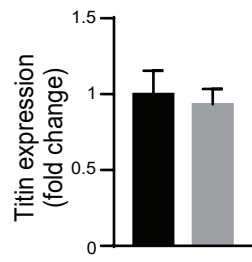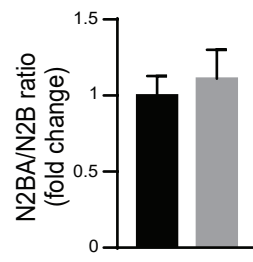

Supplement: mmc3.pdf [file mmc3.pdf]

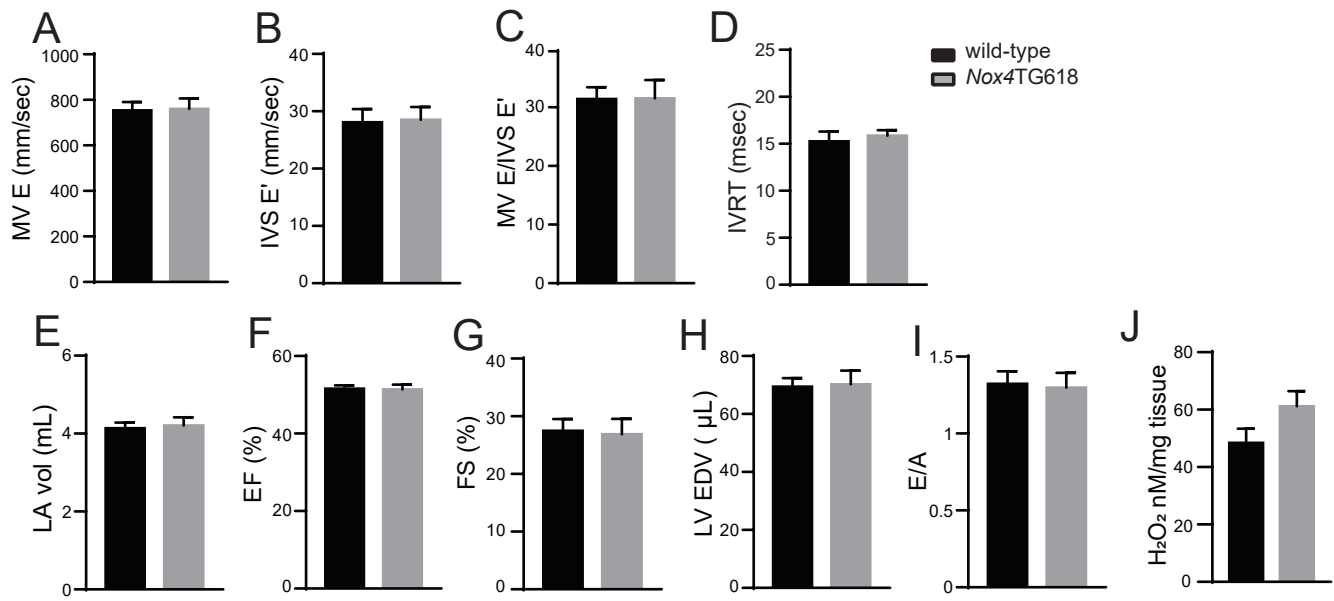

Supplement: mmc4.pdf [file mmc4.pdf]
